# Supplementary material for: Potassium manganese hexacyanoferrate with improved lifespan in Zn(CF3SO3)2 electrolyte for aqueous zinc-ion batteries
Source: Royal Society of Chemistry journal article supplement (doi:10.1039/d1se02003j), 2022-01-01
Supplement: d1se02003j1.pdf [file d1se02003j1.pdf]

## Supporting Information

### Potassium Manganese Hexacyanoferrate With Improved Lifespan in Zn(CF<sub>3</sub>SO<sub>3</sub>)<sub>2</sub> Electrolyte for Aqueous Zinc-ion Batteries

Ni, Gang <sup>a,\*</sup>; Hao, Zhao <sup>a</sup>; Zou, Guoyin <sup>a</sup>; Xu, Xiuwen <sup>a</sup>; Bowen Hu, <sup>a</sup> Cao, Fuhu <sup>a,\*</sup>;  
Zhou, Chenggang <sup>b</sup>

*a. School of Chemistry and Chemical Engineering, Hefei University of Technology, Hefei, 230009, Anhui, P. R. China.*

*b. Faculty of Materials Science and Chemistry, China University of Geoscience, Wuhan, 430078, Hubei, P. R. China.*

*\*. Corresponding author, Email address: gangni@hfut.edu.cn, fhcao@hfut.edu.cn*

**Table S1. Refinement results for KMHCF.** Atomic and unit cell parameters from the least squares fitting routines in Fullprof ( $R_p = 7.47$ ,  $R_{wp} = 9.63$ ,  $\chi^2 = 1.48$ ).

| P 2 <sub>1</sub> /n, a = 10.0912 Å, b = 7.3013 Å, c = 6.9716 Å, β = 90.2634°, V = 513.654 |       |        |        |        |       |
|-------------------------------------------------------------------------------------------|-------|--------|--------|--------|-------|
| Atom                                                                                      | Wyck. | x/a    | y/b    | z/c    | Occ.  |
| Fe1                                                                                       | 2a    | 0      | 0      | 0      | 0.964 |
| Mn1                                                                                       | 2d    | 0      | 0.5    | 0.5    | 1     |
| N1                                                                                        | 4e    | 0.4514 | 0.2530 | 0.8542 | 0.964 |
| C1                                                                                        | 4e    | 0.5053 | 0.6386 | 0.2778 | 0.964 |
| N2                                                                                        | 4e    | 0.0525 | 0.3159 | 0.7426 | 0.964 |
| C2                                                                                        | 4e    | 0.9651 | 0.8058 | 0.1399 | 0.964 |
| N3                                                                                        | 4e    | 0.2077 | 0.4588 | 0.3700 | 0.964 |
| C3                                                                                        | 4e    | 0.7018 | 0.4837 | 0.5468 | 0.964 |
| K1                                                                                        | 4e    | 0.7387 | 0.9397 | 0.4726 | 0.911 |

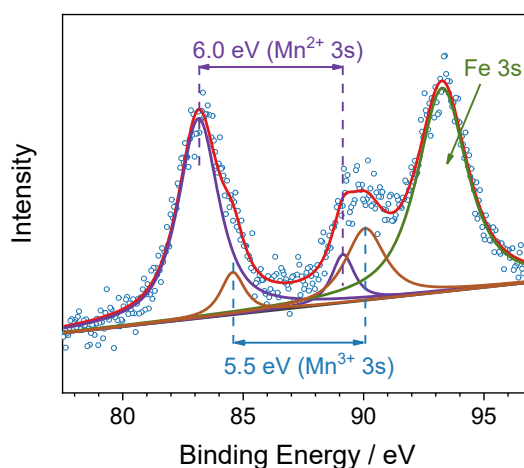

**Figure S1.** High resolution Mn 3s XPS results of KMHCF.

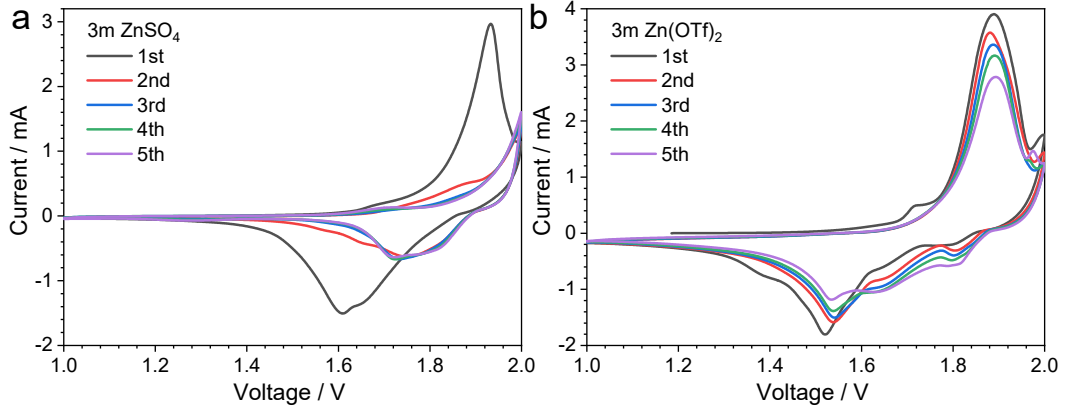

**Figure S2.** Cyclic voltammetry curves of KMhCF in zinc sulfate.

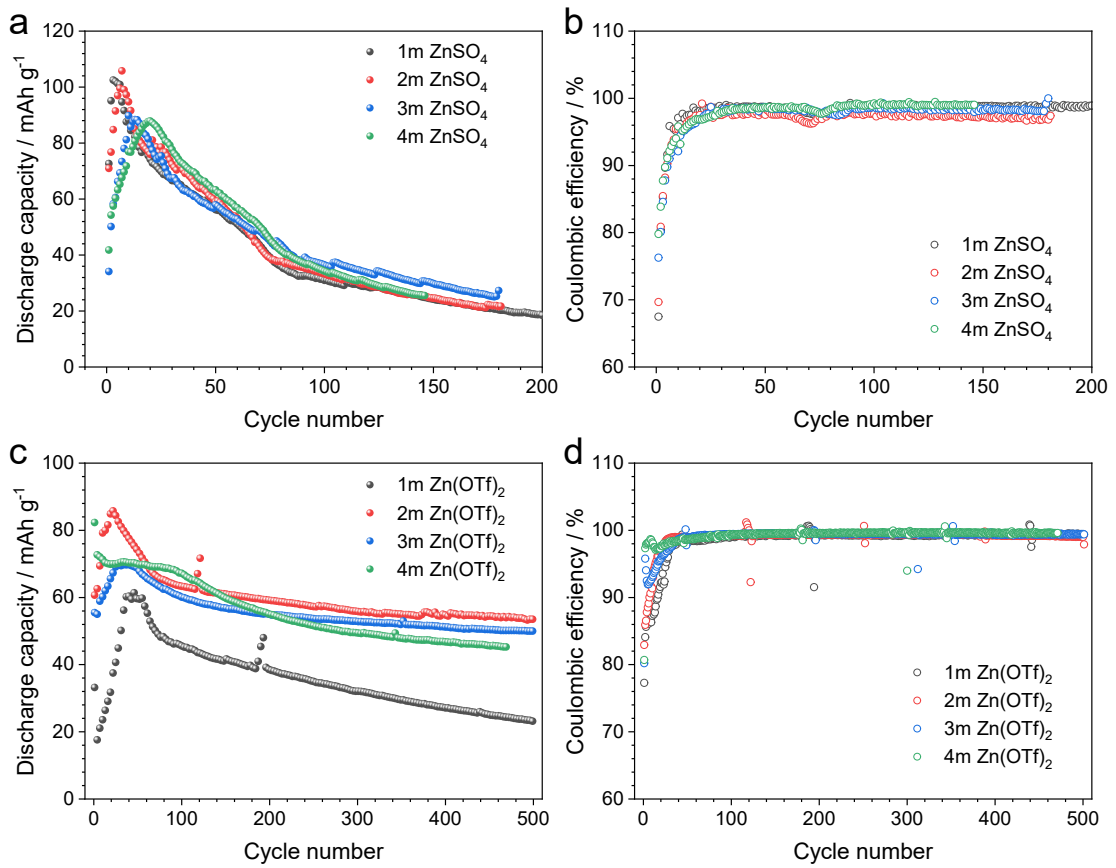

**Figure S3.** Long term cycle performance of KMhCF in  $\text{ZnSO}_4$  (a, b) and  $\text{Zn}(\text{OTf})_2$  with concentration from 1m to 4m at a current density of  $250 \text{ mA} \cdot \text{g}^{-1}$

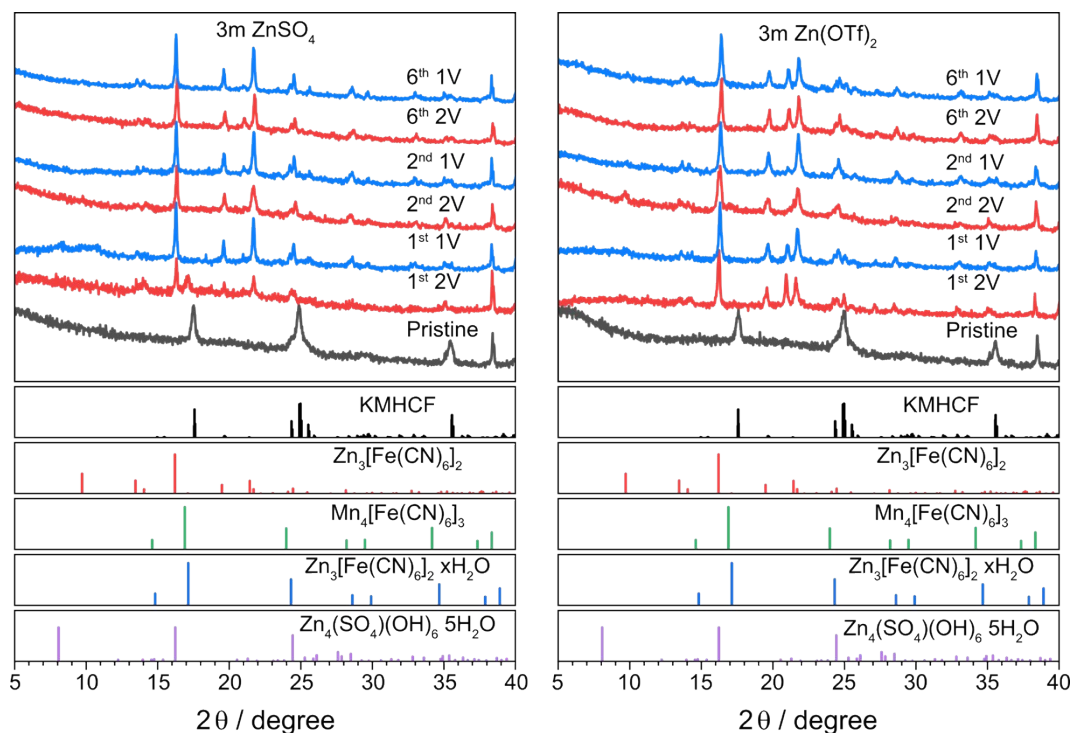

**Figure S4.** Ex-situ XRD patterns of the KMHCF electrodes at different states in  $\text{ZnSO}_4$  and  $\text{Zn}(\text{OTf})_2$  electrolytes.

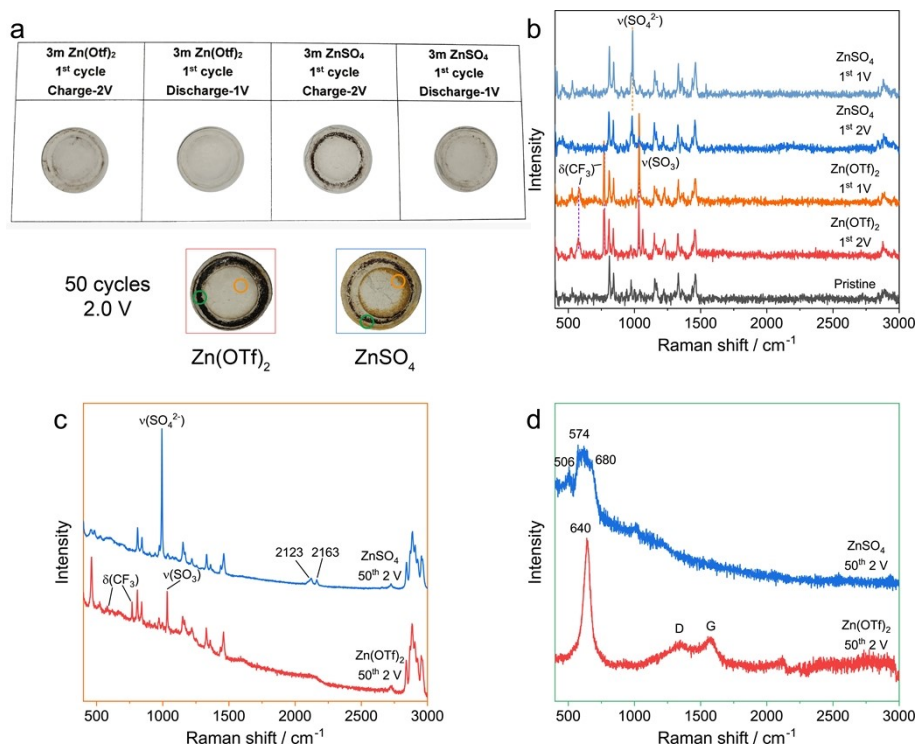

**Figure S5.** The photograph (a) and Raman spectra (b-d) of the separators after galvanostatic cycling in the KMHCF/Zn batteries with different electrolytes.

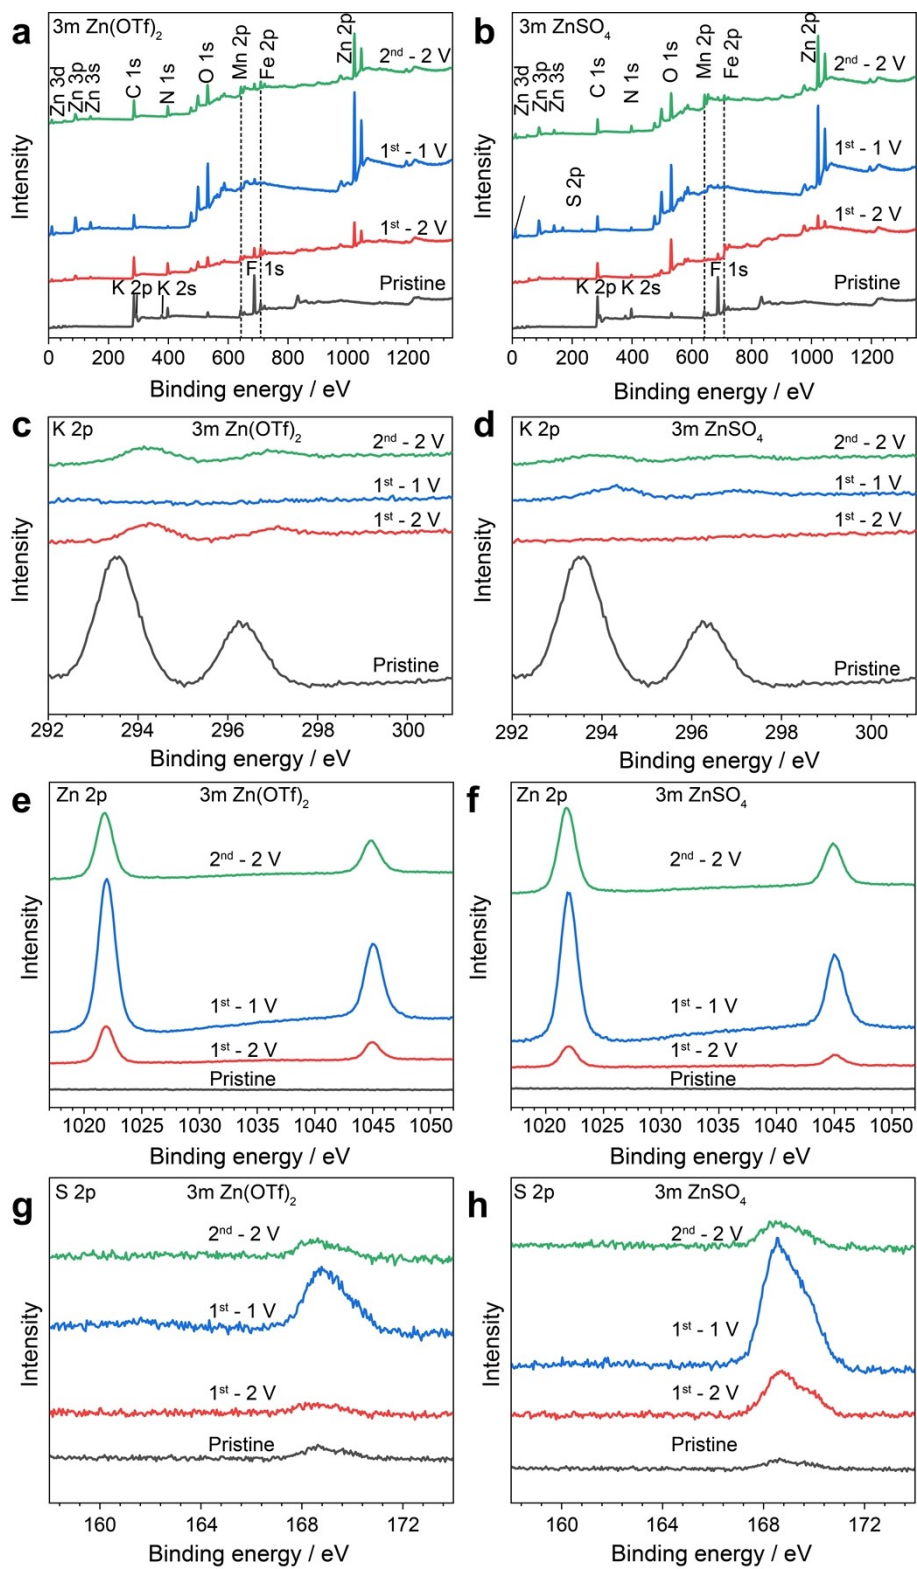

**Figure S6.** The XPS results of the KMHCf electrodes at different states in ZnSO<sub>4</sub> and Zn(OTf)<sub>2</sub> electrolyte

**Table S2.** Comparison of the electrochemical performance of various M-HCFs as cathode materials in ARZIBs

| Cathode materials                                      | Electrolyte                                          | Specific capacity at small current density          | Long-term capacity retention                                                                                   | Reference    |
|--------------------------------------------------------|------------------------------------------------------|-----------------------------------------------------|----------------------------------------------------------------------------------------------------------------|--------------|
| ZnHCF                                                  | 1M ZnSO <sub>4</sub>                                 | 65.4 mAh·g <sup>-1</sup> at 1C                      | 76% retains after 100 cycles at 60 mA·g <sup>-1</sup> ; 81% retains after 100 cycles at 300 mA·g <sup>-1</sup> | <sup>1</sup> |
| KCuFe(CN) <sub>6</sub>                                 | 0.1M Zn(ClO <sub>4</sub> ) <sub>2</sub>              | ~55 mAh·g <sup>-1</sup>                             | 58.1% retains after 500 cycles                                                                                 | <sup>2</sup> |
| CuZn-HCF                                               | 0.02M ZnSO <sub>4</sub>                              | <60 mAh·g <sup>-1</sup> at 1C                       | 85.54% after 1000 cycles at 1C                                                                                 | <sup>3</sup> |
| CoFe(CN) <sub>6</sub>                                  | 4M Zn(CF <sub>3</sub> SO <sub>3</sub> ) <sub>2</sub> | 173.4 mAh·g <sup>-1</sup> at 300 mA·g <sup>-1</sup> | near 100% after 2200 cycles at 3.0 A·g <sup>-1</sup>                                                           | <sup>4</sup> |
| V-HCF                                                  | 4M Zn(CF <sub>3</sub> SO <sub>3</sub> ) <sub>2</sub> | 187 mAh·g <sup>-1</sup> at 500 mA·g <sup>-1</sup>   | 96.5% retains after 500 cycles at 2.0 A·g <sup>-1</sup>                                                        | <sup>5</sup> |
| K <sub>1.6</sub> Mn <sub>1.2</sub> Fe(CN) <sub>6</sub> | 2 M Zn(ClO <sub>4</sub> ) <sub>2</sub>               |                                                     | 49% retains after 120 cycles at 200 mA·g <sup>-1</sup> (aqueous)                                               | <sup>6</sup> |
| KMHCF                                                  | 3m Zn(CF <sub>3</sub> SO <sub>3</sub> ) <sub>2</sub> | 123.8 mAh·g <sup>-1</sup> at 50 mA·g <sup>-1</sup>  | 90% retains after 500 cycles                                                                                   | This work    |

## Reference

1. L. Zhang, L. Chen, X. Zhou and Z. Liu, *Adv. Energy Mater.*, 2015, **5**, 1400930.
2. R. Trocoli, G. Kasiri and F. La Mantia, *J. Power Sources*, 2018, **400**, 167-171.
3. G. Kasiri, J. Glenneberg, A. Bani Hashemi, R. Kun and F. La Mantia, *Energy Storage Mater.*, 2019, **19**, 360-369.
4. L. T. Ma, S. M. Chen, C. B. Long, X. L. Li, Y. W. Zhao, Z. X. Liu, Z. D. Huang, B. B. Dong, J. A. Zapien and C. Y. Zhi, *Adv. Energy Mater.*, 2019, **9**, 1902446.
5. Y. Zhang, Y. Wang, L. Lu, C. Sun and D. Y. W. Yu, *J. Power Sources*, 2021, **484**, 229263.
6. Q. Li, K. Ma, G. Yang and C. Wang, *Energy Storage Mater.*, 2020, **29**, 246-253.
